# Supplementary material for: Methylation Assessment for the Prediction of Malignancy in Mediastinal Adenopathies Obtained by Endobronchial Ultrasound-Guided Transbronchial Needle Aspiration in Patients with Lung Cancer
Source: Cancers (Basel). 2019 Sep 20;11(10):1408. doi: 10.3390/cancers11101408 (PMC6826358; doi:10.3390/cancers11101408)
Supplement: Supplementary file 1 [file cancers-11-01408-s001.xlsx]

## Sheet: Table S1
Table S1. Clinical characteristics of patients.
Characteristics (n = 112 patients)	n (%)
Sex
Male	94 (83.9%)
Female	18 (16.1%)
Age (mean±SD)	64.9 ± 9.9
<65 years	60 (53.6%)
≥65 years	52 (46.4%)
Tobacco habit
Actual or former smoker	100 (89.3%)
Non-smoker	10 (8.9%)
Unknown	2 (1.8%)
Location of primary tumor
Upper right lobe	53 (47.3%)
Medium right lobe	3 (2.7%)
Lower right lobe	21 (18.8%)
Upper left lobe	21 (18.8%)
Lower left lobe	10 (8.9%)
Left hilio	1 (0.9%)
Unknown	3 (2.7%)
Size of primary tumor
≤30 mm	52 (46.4%)
30–50 mm	32 (28.6%)
>50 mm	24 (21.4%)
Unknown	4 (3.6%)
Tumor histopathology
Unknown	54 (48.2%)
Adenocarcinoma	33 (29.5%)
Squamous cell	23 (20.5%)
Large cell	1 (0.9%)
NOS	1 (0.9%)
NOS: not otherwise specific.

## Sheet: Table S2
Table S2. Sensitivity and specificity of the genes analyzed based on the Youden index.
Gene	TP + FN vs. TN (108 vs. 110)			FN vs. TN (18 vs. 110)
	Cut-off	Sensitivity (%) (95% CI)	Specificity (%) (95% CI)	Cut-off	Sensitivity (%) (95% CI)	Specificity (%) (95% CI)
	(% methylation)			(% methylation)
p16/INK4a	>0.147	43.52	80.91	>0.295	44.44	90
		(34.0-53.4)	(72.3-87.8)		(21.5-69.2)	(82.8-94.9)
MGMT	>0.285	16.67	94.55	>6 × 10−5	77.78	50.91
		(10.2-25.1)	(88.5-98.0)		(52.4-93.6)	(41.2-60.6)
SHOX2	>1.185	75	93.64	>0.660	66.67	74.55
		(65.7-82.8)	(87.3-97.4)		(41.0-86.7)	(65.4-82.4)
E-cadherin	≤0.424	66.36	60	>1.244	41.18	85.45
		(56.6-75.2)	(50.2-69.2)		(18.4-67.1)	(77.5-91.5)
DLEC1	>0,020	41.9	86.36	>4 × 10−5	77.78	40.91
		(32.3-51.9)	(78.5-92.2)		(52.4-93.6)	(31.6-50.7)
RASSF1A	>1,234	29.52	98.18	≤1 × 10−6	61.11	72.73
		(21.0-39.2)	(93.6-99.8)		(35.7-82.7)	(63.4-80.8)
TP: true positives; FN: false negatives; TN: true negatives.

## Sheet: Table S3
Table S3. Prediction of lymph node malignancy in individual patients based on the cross-validated classification model 3.
Patient	Sex	Age (years)	Diameter adenopathy (mm)	SUV adenopathy	Methylated SHOX2 (%)	CV	Diagnosis according to Model 3	Final clinical diagnosis
						p score
1	Male	63	11	6.5	2.73	0.437	malignant	malignant
2	Female	80	9	2.9	0.67	0.931	malignant	malignant
3	Male	80	6.5	1	0.73	0.041	non-malignant	malignant
4	Male	59	17	2.6	0.022	0.0009	non-malignant	non-malignant
5	Female	69	9	3.3	0	0.081	malignant	non-malignant
6	Male	71	14	3	0.33	0.025	non-malignant	non-malignant
SUV: standard uptake value; CV: cross-validated. A cross-validated p score was obtained for each adenopathy based on patient`s sex, age, diameter of adenopathy in mm, SUV from adenopathy and methylation percentage of SHOX2. According to model 3, a lymphadenopathy with a p score ≤0.076 is classified as non-malignant, while a lymphadenopathy with a p score >0.076 is classified as malignant.

## Sheet: Table S4
Gene	Outer Primers	MS-qPCR primers	MS-qPCR Probe	Outer and MS-qPCR primers	qPCR Amplification Efficiency
(n CpG sites analyzed)				T (°C)—size ( bp)
p16/INK4a	F: GAAAGAGGAGGGGTTGGTTGG	F: TTATTAGAGGGTGGGGCGGATCGC	6FAM-AGTAGTATGGAGTCGGCGGCGGG- MGB3NFQ’	64 °C—193 bp	0.9203
18 CpG sites	R: ACRCCCRCACCTCCTCTACC	R: GACCCCGAACCGCGACCGTAA		60 °C—150 bp
	GC: Chr 9:21974737-21974928	GC: Chr9:21974758-21974907		56 °C—135 bp
MGMT	F: GTGTTTTGGATATGTTGGGATAGTT	F: TTTCGACGTTCGTAGGTTTTCGC	(5′)6FAM-CGTATCGTT/ZEN/TGCGATTTGGTGAGTGTTTG-3IABkFQ(3′)	60 °C—81 bp	0.9012
11 CpG sites	R: AAACTCCACACTCTTCCAAAAAC	R: GCACTCTTCCGAAAACGAAACG		56 °C—152 bp
	GC: Chr10:129467205-129467339	GC: Chr10:129467252-129467332		60 °C—124 bp
SHOX2	F: GTTAAATTTTGTATAAGGTTTTT	F: GTTTTTTGGATAGTTAGGTAATTTTC	6FAM-ATCGGGGTC/ZEN/GTACGAGTATAG-3IABkFQ(3′)	60 °C—186 bp	0.9154
11 CpG sites	R: CTAATTTAGGTCCTCCTACCTTCTAA	R: CCTCCTACCTTCTAACCCG		60 °C—112 bp
	GC: Chr3:158103533-158103684	GC: Chr3:158103550-158103673		52 °C—207 bp
E-cadherin	F: GTGTTTTYGGGGTTTATTTGGTTGT	F: TGTAGTTACGTATTTATTTTTAGTGGCGTC	6FAM-TGCGGAAGT/ZEN/TAGTTTAGATTTTAGTTCGTT-3IABkFQ(3′)	60 °C—136 bp	0.8994
9 CpG sites	R: TACRACTCCAAAAACCCATAACTAACC	R: CGAATACGATCGAATCGAACCG		58 °C—144 bp
	GC: Chr16:68737249-68737434	GC: Chr16:68737271-68737382		62 °C—76 bp
DLEC1	F: TAAAAGGATAATGTTGAAG	F: GATTATAGCGATGACGGGATTC	6FAM-AGGTCGGAA/ZEN/GTCGAAGTGTCGTA-3IABkFQ(3′)	60 °C—162 bp	0.9178
13 CpG sites	R: CRCCCACATTATCCCCTAAC	R: ACGCTAAAAACCTCCGCGTTTTA		60 °C—162 bp
	GC: Chr3:38039094-38039300	GC: Chr3:38039130-38039265
RASSF1A	F: GTTTAGTTTGGATTTTGGGGGAG	F: GGGTTCGTTTTGTGGTTTCGTTC	6FAM-ACTTTAAAC/ZEN/GCTAACAAACGCGA AC-3IABkFQ(3′)	58 °C—144bp	0.9413
9 CpG sites	R: CCCRCAACTCAATAAACTCAAACTC	R: TAACCCGATTAAACCCGTACTTCG		62 °C—76bp
	GC: Chr3:50340772-50340915	GC: Chr3:50340805-50340880
MYOD1	F: CCAACTCCAAATCCCCTCTCTAT	F: CCAACTCCAAATCCCCTCTCTAT	(5′)6FAM-TCCCTTCCT/ZEN/ATTCCTAAATCCAACCTAAATACCTCC-3IABkFQ(3′)	60 °C—162bp	0.9106
No CpG sites	R: TGATTAATTTAGATTGGGTTTAGAGAAGGA	R: TGATTAATTTAGATTGGGTTTAGAGAAGGA		60 °C—162bp
	GC: Chr11:17714204-17714365	GC: Chr11:17714204-17714365
GC: Genomic coordinate; Chr: chromosome.
